# Supplementary material for: A Necropsy Study of Disease and Comorbidity Trends in Morbidity and Mortality in the Koala (Phascolarctos cinereus) in South-East Queensland, Australia
Source: PubMed Central journal article supplement (PMC6877607; doi:10.1038/s41598-019-53970-0), 2019-11-25

**A Necropsy Study of Disease and Comorbidity Trends in Morbidity and Mortality in the Koala (*Phascolarctos cinereus*) in South-East Queensland, Australia.**

V. Gonzalez-Astudillo, J. Henning, L. Valenza, L. Knott, A. McKinnon, R. Larkin, R. Allavena

**Supplementary Table S1:** Single (Total: N=220) and co-occurring (Total: N=299) diagnoses made of koalas submitted to wildlife hospitals and receiving necropsies at The University of Queensland between April 2013 and July 2016 in South-East Queensland, Australia.

| Diagnoses                                      | Co-morbidity<br>(N diagnoses) |            |
|------------------------------------------------|-------------------------------|------------|
|                                                | Absent                        | Present    |
| Infectious                                     | 31.8% (70)                    |            |
| Infectious (multicentric)                      |                               | 32.1% (96) |
| Infectious/neoplasia                           |                               | 4.3% (13)  |
| Infectious/neoplasia/senescence                |                               | 1.0% (3)   |
| Infectious/neoplasia/senescence/other diseases |                               | 0.3% (1)   |
| Infectious/other diseases                      |                               | 7.7% (23)  |
| Infectious/senescence                          |                               | 15.1% (45) |
| Infectious/senescence/other diseases           |                               | 3.0% (9)   |
| Infectious/senescence/trauma                   |                               | 1.3% (4)   |
| Infectious/trauma                              |                               | 18.4% (55) |
| Infectious/trauma/other diseases               |                               | 2.0% (6)   |
| Infectious/trauma/senescence/other diseases    |                               | 0.7% (2)   |
| Neoplasia                                      | 6.4% (14)                     |            |
| Neoplasia/infectious                           |                               | 0.3% (1)   |
| Neoplasia/infectious/other diseases            |                               | 0.3% (1)   |
| Neoplasia/other diseases                       |                               | 0.7% (2)   |
| Neoplasia/senescence                           |                               | 1.3% (4)   |
| Neoplasia/trauma                               |                               | 0.7% (2)   |
| Other diseases                                 | 4.1% (9)                      |            |
| Senescence                                     | 3.6% (8)                      |            |
| Senescence/other diseases                      |                               | 1.7% (5)   |
| Trauma                                         | 42.7% (94)                    |            |
| Trauma/other diseases                          |                               | 3.0% (9)   |
| Trauma/senescence                              |                               | 1.0% (3)   |
| Undetermined                                   | 3.6% (8)                      |            |
| Wasting unknown cause                          | 7.7% (17)                     |            |
| Wasting unknown cause/other diseases           |                               | 0.3% (1)   |
| Wasting unknown cause/trauma                   |                               | 4.3% (13)  |
| Wasting unknown cause/trauma/other diseases    |                               | 0.3% (1)   |

**Supplemental Material S2.** Clinical guidelines for the diagnoses of conjunctivitis and cystitis in koalas according to the Standard Operating Procedures by the Moggill Koala Rehabilitation Center, in Queensland, Australia, 2017.

| Condition      | Score | Severity | Criterion                                                                                                                                                                                                                                       |
|----------------|-------|----------|-------------------------------------------------------------------------------------------------------------------------------------------------------------------------------------------------------------------------------------------------|
| Conjunctivitis | 1     | Mild     | Acute membrana nictans inflammation lacking proliferative change with epiphora                                                                                                                                                                  |
|                | 2     | Moderate | Mild conjunctiva and membrana nictans proliferation with serous exudate, Keratitis may or may not be present, or periorbital alopecia                                                                                                           |
|                | 3     | Severe   | Chronic conjunctiva and membrana nictans inflammation<br>Mucopurulent discharge causing eyelid adhesion,<br>Possible conjunctival bleeding,<br>Keratitis leading to partial or total corneal opacity,<br>Focally extensive periorbital alopecia |
| Cystitis       | 1     | Mild     | Common vestibule is slightly or moderately soiled                                                                                                                                                                                               |
|                | 2     | Moderate | Soiled common vestibule, incontinence evident from dribbling micturition, urine odor present, tacky fur                                                                                                                                         |
|                | 3     | Severe   | Soiled common vestibule with matted fur, fur loss,<br>Excoriation, incontinence, hemorrhagic dysuria, associated with low BC                                                                                                                    |

**Supplementary figure S1:** Percentage of koalas with gross lesions compatible with chlamydia across all body systems affected, stratified by sex. Koalas were submitted to South-East Queensland hospitals and receiving necropsies at The University of Queensland from 2013 through to 2016 (N=304).

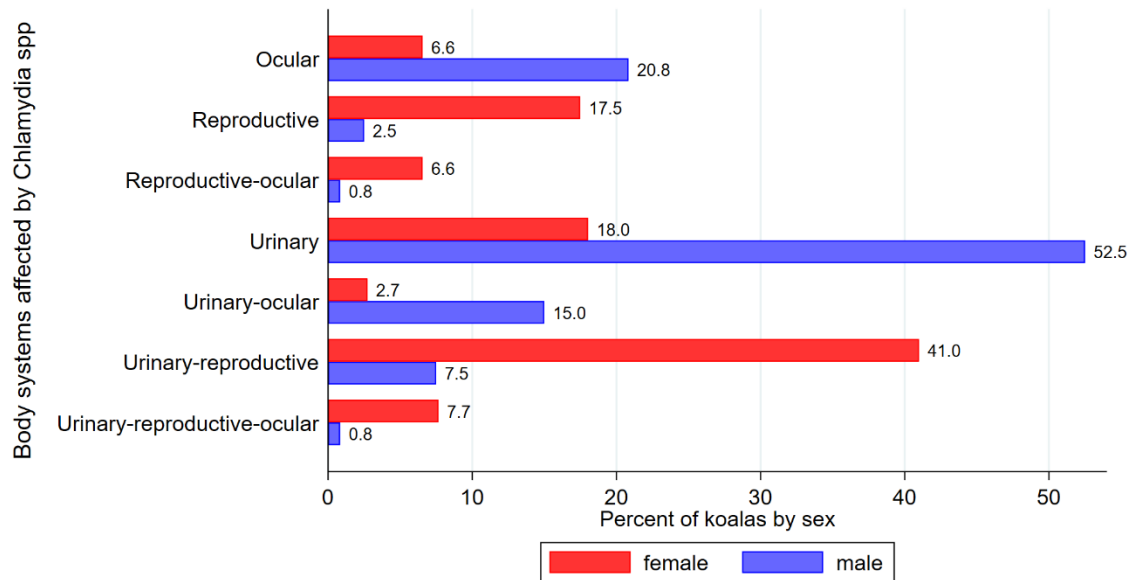

Supplement: 41598_2019_53970_MOESM1_ESM.pdf [file 41598_2019_53970_MOESM1_ESM.pdf]
